# Supplementary material for: Constitutive overexpression of TNF in BPSM1 mice causes iBALT and bone marrow nodular lymphocytic hyperplasia
Source: PubMed Central journal article supplement (PMC6378607; doi:10.1111/imcb.12197), 2018-09-08
Supplement: IMCB-97-29-s001.pdf [file IMCB-97-29-s001.pdf]

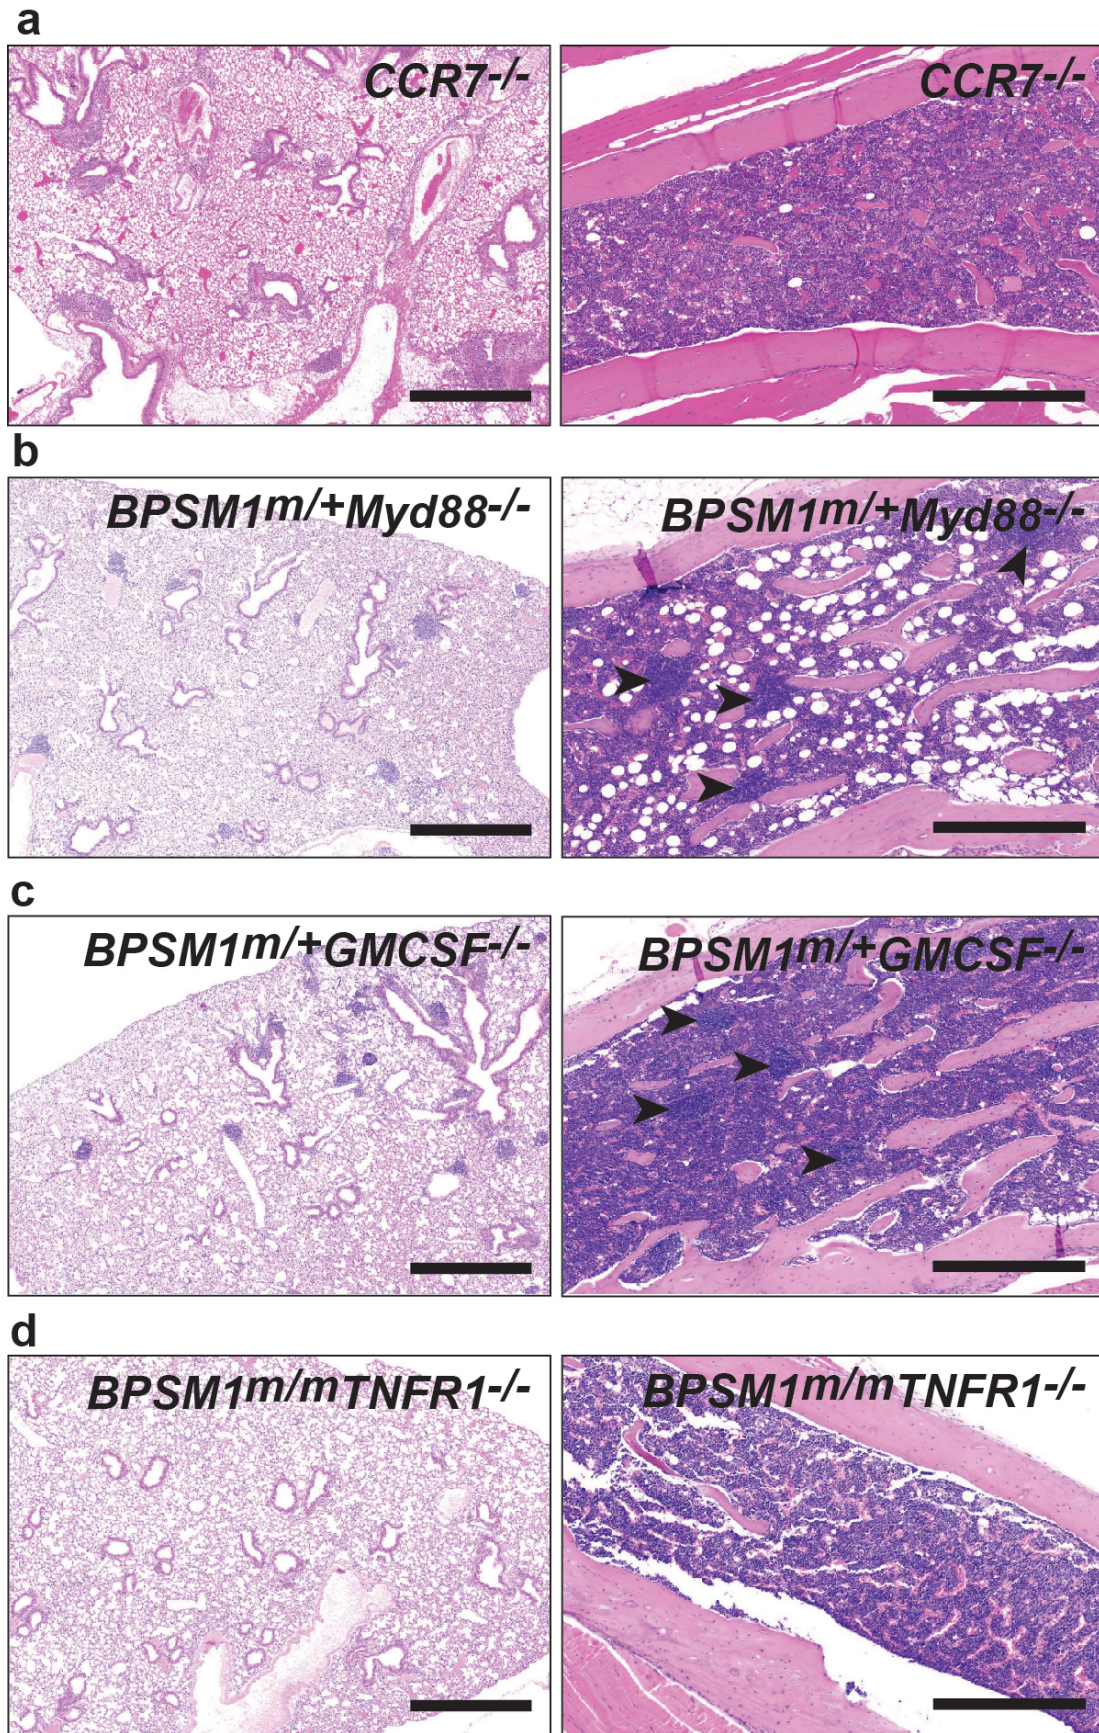

Supplementary figure 1

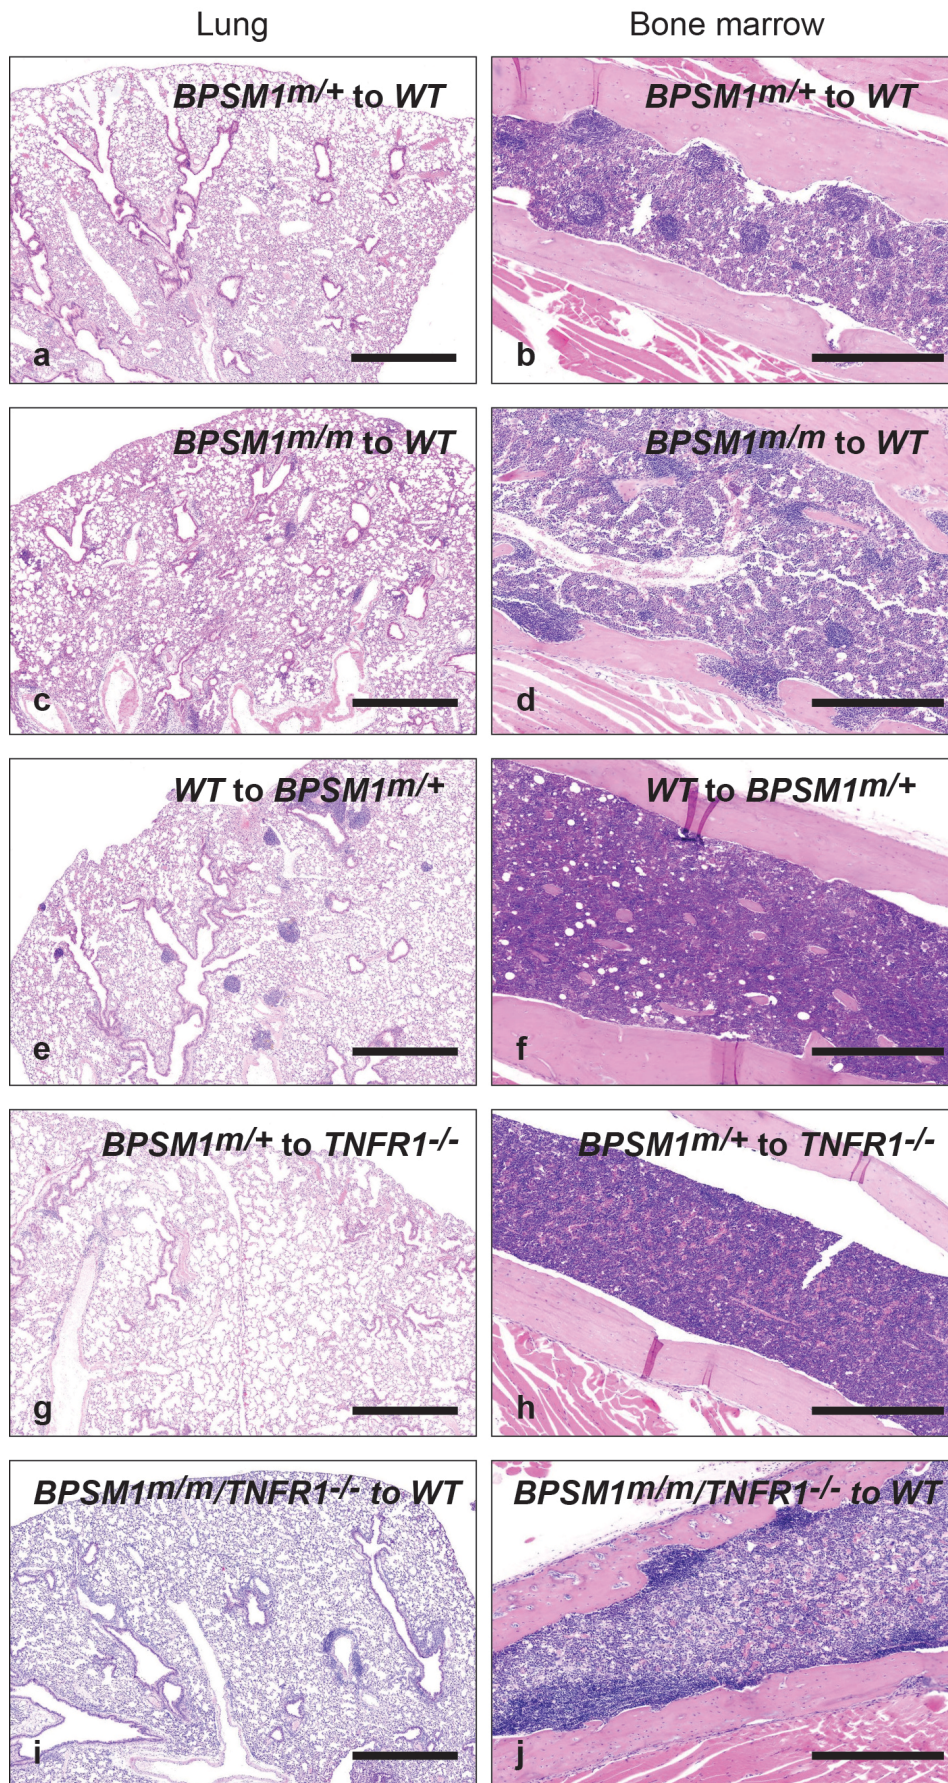

Supplementary figure 2

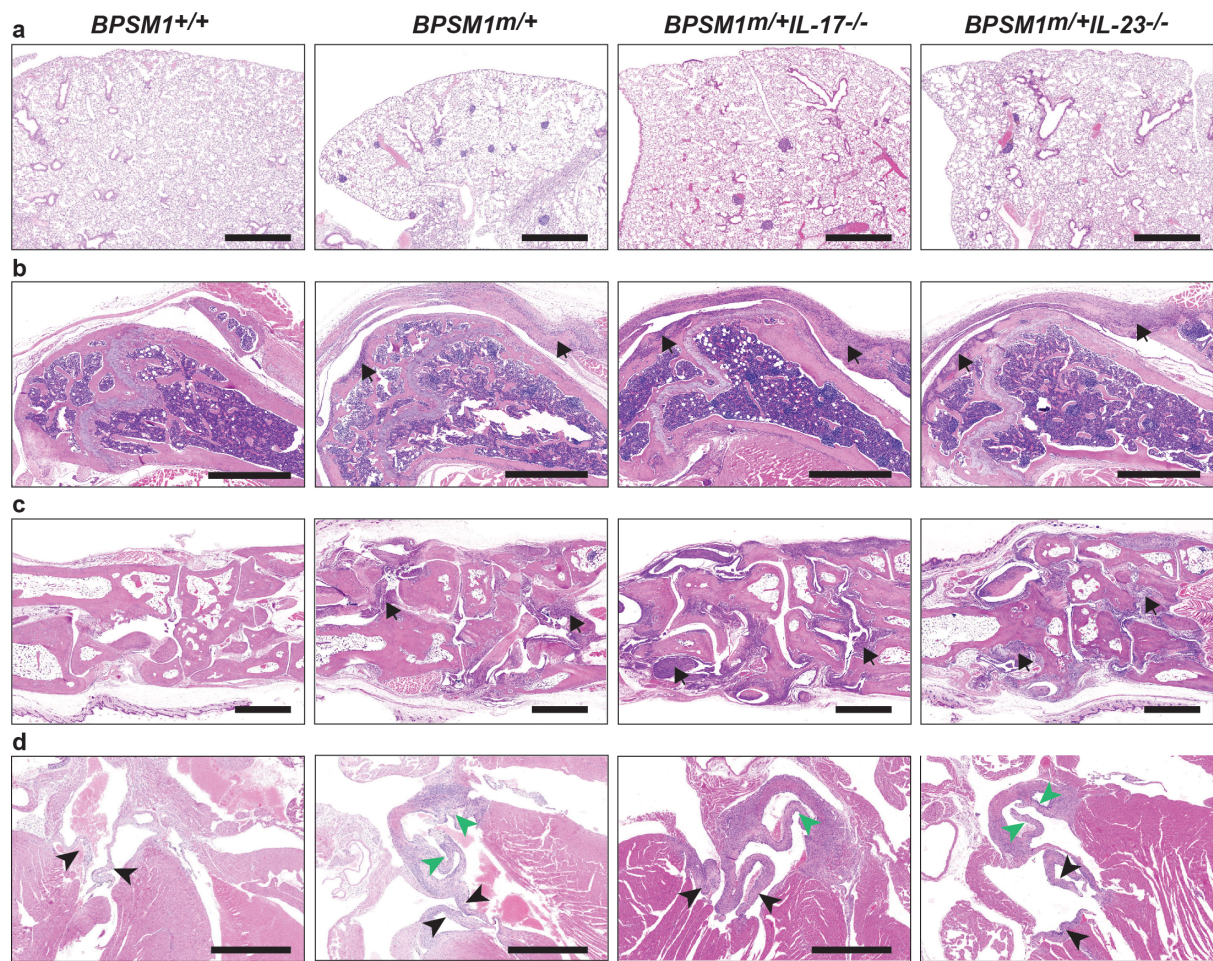

Supplementary figure 3

### Legends to Supplementary figures

**Supplementary Figure 1. *iBALT* and bone marrow NLH in the absence of *CCR7*, *Myd88* or *GM-CSF*, or *TNFR1*.** Representative H&E-stained lung (left panels) and bone marrow (right panels) sections from *CCR7*<sup>-/-</sup> (a), *BPSM1*<sup>m/+</sup>*Myd88*<sup>Ki/Ki</sup> (b), *BPSM1*<sup>m/+</sup>*GMCSF*<sup>-/-</sup> (c) and *BPSM1*<sup>m/m</sup>*TNFR1*<sup>-/-</sup> mice (d). Arrowheads indicate bone marrow lymphocyte follicles. Scale bars, 1 mm (lung) or 0.5 mm (bone marrow).

**Supplementary Figure 2. *Bone marrow transplant experiments.*** H&E-stained lung tissue (a, c, e, g, i) and femoral bone marrow (b, d, f, h, j) from lethally-irradiated recipient mice transplanted with donor bone marrow. Genotypes of donors and recipients are indicated in each

panel. Scale bar, 1mm (**a, c, e, g, i**); scale bar, 0.5 mm (**b, d, f, h, j**). Results are described in text and summarised in Table 1.

**Supplementary Figure 3. Loss of *IL-17* or *IL-23* has no impact on NLH, arthritis or heart valve disease.** **a)** Representative H&E-stained lung tissue showing the presence of iBALT in *BPSM1<sup>m/+</sup>IL-17<sup>-/-</sup>* and *BPSM1<sup>m/+</sup>IL-23<sup>-/-</sup>* mice. **b)** Presence of NLH in the bone marrow of *BPSM1<sup>m/+</sup>IL-17<sup>-/-</sup>* and *BPSM1<sup>m/+</sup>IL-23<sup>-/-</sup>* mice. Note the extensive bone erosion and synovium hyperplasia in *BPSM1<sup>m/+</sup>IL-17<sup>-/-</sup>* and *BPSM1<sup>m/+</sup>IL-23<sup>-/-</sup>* animals (black arrows). **c)** The ankles of *BPSM1<sup>m/+</sup>IL-17<sup>-/-</sup>* and *BPSM1<sup>m/+</sup>IL-23<sup>-/-</sup>* mice show the typical bone erosion associated with severe arthritis (black arrows). **d)** Thickening of the mitral valves (black arrowheads) and inflammatory infiltration (green arrowheads) in the heart of *BPSM1<sup>m/+</sup>IL-17<sup>-/-</sup>* and *BPSM1<sup>m/+</sup>IL-23<sup>-/-</sup>*. Scale bars, 1mm (**a, b, c, d**).
